# Supplementary material for: Axin2 coupled excessive Wnt‐glycolysis signaling mediates social defect in autism spectrum disorders
Source: PubMed Central journal article supplement (PMC10245038; doi:10.15252/emmm.202217101), 2023-04-20
Supplement: EMMM-15-e17101-s013.pdf [file EMMM-15-e17101-s013.pdf]

## Expanded View Figures

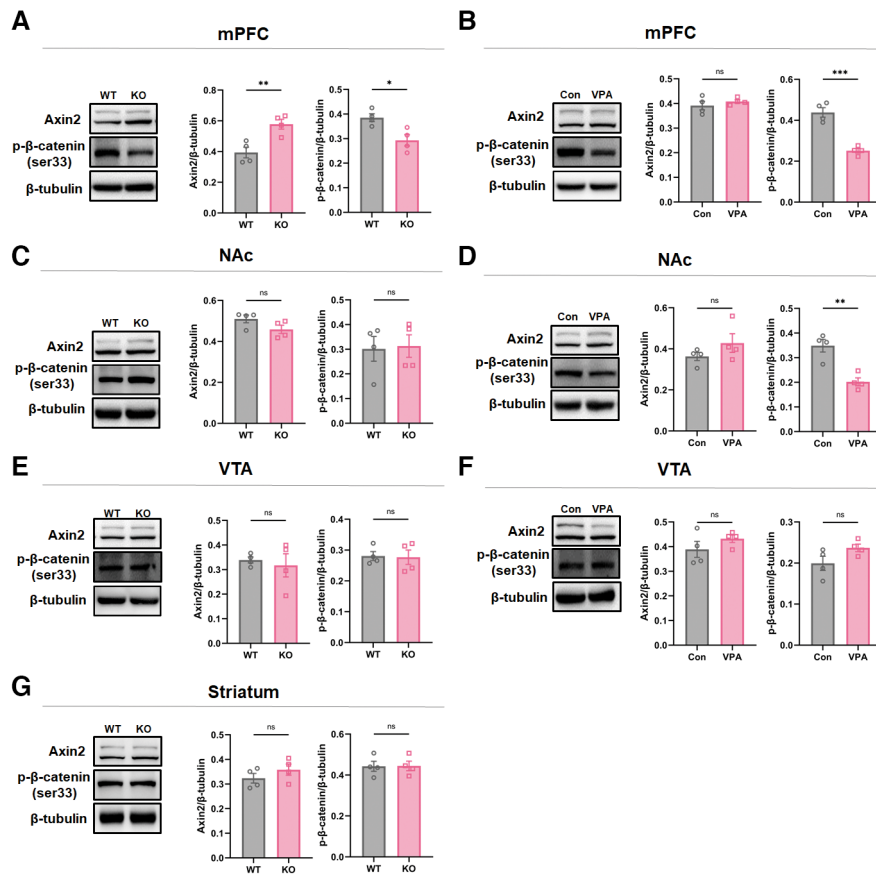

**Figure EV1. Expression of Wnt signaling components in other brain regions.**

- A Western blotting of Axin2 and p-β-catenin(S33) in the mPFC of WT and *Shank3*<sup>-/-</sup> mice.  
 B Western blotting of Axin2 and p-β-catenin(S33) in the mPFC of control and VPA-treated mice.  
 C Western blotting of Axin2 and p-β-catenin(S33) in the NAc of WT and *Shank3*<sup>-/-</sup> mice.  
 D Western blotting of Axin2 and p-β-catenin(S33) in the NAc of control VPA-treated mice.  
 E Western blotting of Axin2 and p-β-catenin(S33) in the VTA of WT and *Shank3*<sup>-/-</sup> mice.  
 F Western blotting of Axin2 and p-β-catenin(S33) in the VTA of control VPA-treated mice.  
 G Western blotting of Axin2 and p-β-catenin(S33) in the striatum of WT and *Shank3*<sup>-/-</sup> mice.

Data information:  $N = 4$  samples from 12 mice per group. Mean ratio  $\pm$  SEM. Two-tailed unpaired  $t$ -test (A, B, p-β-catenin in C, D-G). Mann-Whitney  $U$  test (Axin2 in C) \* $P < 0.05$ . \*\* $P < 0.01$ . \*\*\* $P < 0.001$ . WT, wild type. KO, *Shank3*<sup>-/-</sup>. Source data are available online for this figure.

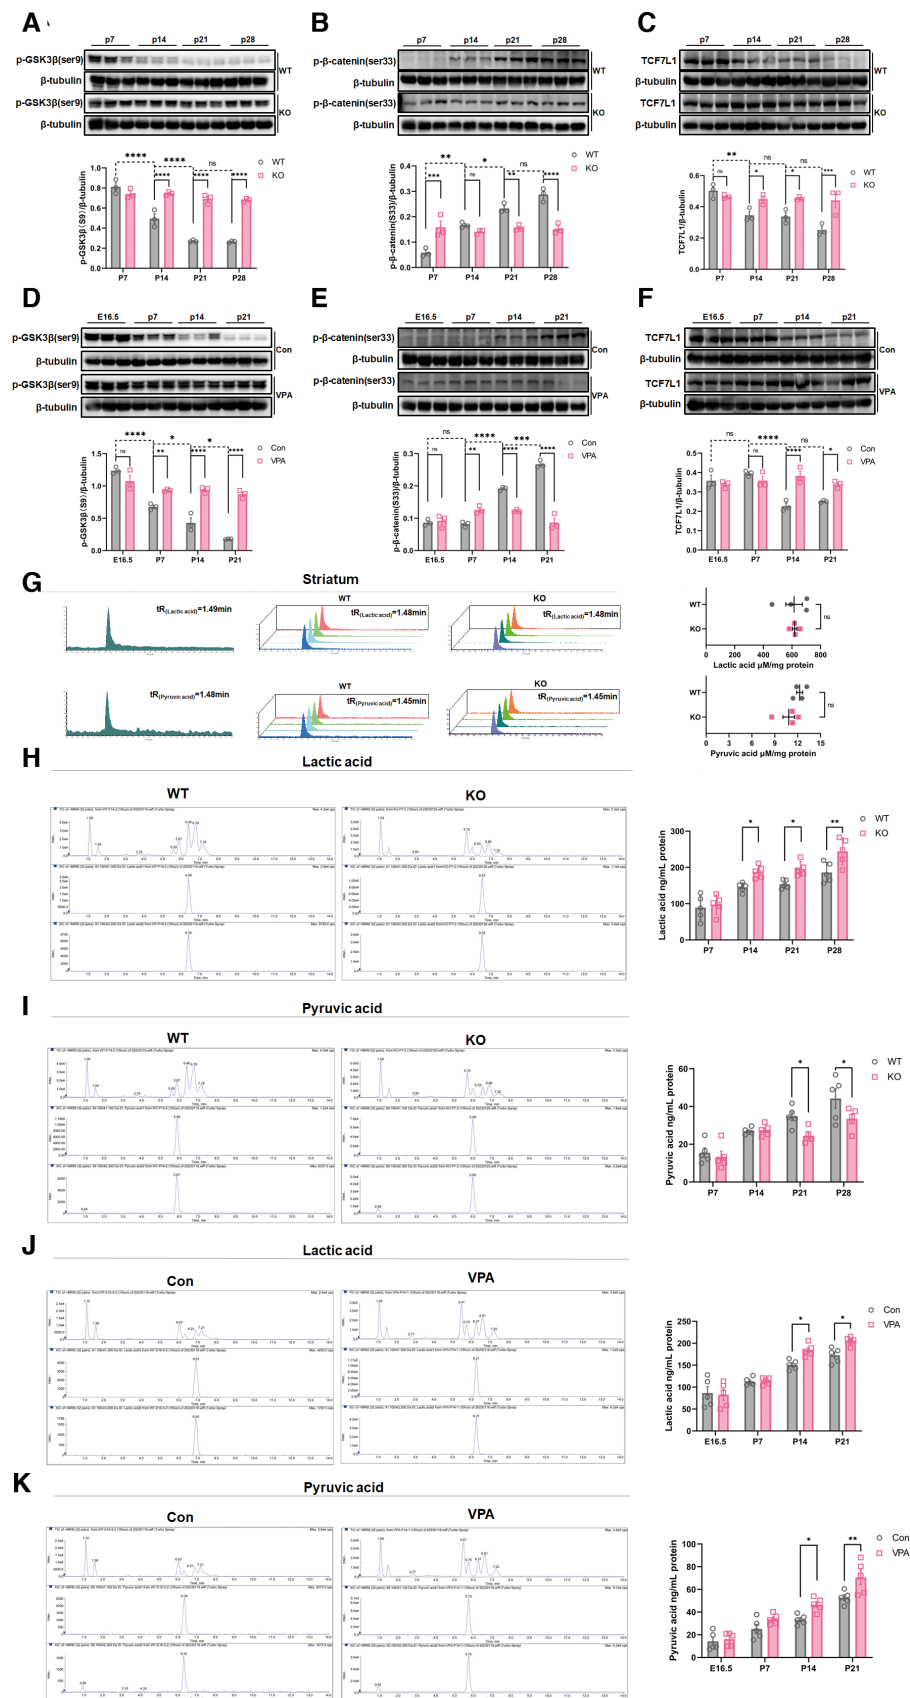

**Figure EV2. Developmental changes of Wnt signaling and glycolysis.**

A–C Western blotting of p-GSK3 $\beta$ (S9), p- $\beta$ -catenin (S33) and TCF7L1 in the ACC of WT and *Shank3*<sup>-/-</sup> mice at P7, P14, P21 and P28.

D–F Western blotting of p-GSK3 $\beta$ (S9), p- $\beta$ -catenin (S33) and TCF7L1 in the ACC of control and VPA-treated mice at E16.5, P7, P14 and P21.

G LS-MS measurement of lactic acid and pyruvic acid in the striatum of WT and *Shank3*<sup>-/-</sup> mice.

H, I LS-MS/MS measurement of lactic acid and pyruvic acid in the ACC of WT and *Shank3*<sup>-/-</sup> mice at P7, P14, P21 and P28.

J, K LS-MS/MS measurement of lactic acid and pyruvic acid in the ACC of control and VPA-treated mice at E16.5, P7, P14 and P21.

Data information:  $N = 4$  samples from 12 mice per group in (A–F), 4 samples from 16 mice per group in (G), 5 samples from 20 mice per group in (H–K). Mean ratio  $\pm$  SEM. Two-way repeated measurement ANOVA and Sidak's multiple comparisons test (A–F, H–K). Two-tailed unpaired t-test (G). \* $P < 0.05$ , \*\* $P < 0.01$ , \*\*\* $P < 0.001$ , \*\*\*\* $P < 0.0001$ . WT, wild type. KO, *Shank3*<sup>-/-</sup>. Con, control.

Source data are available online for this figure.

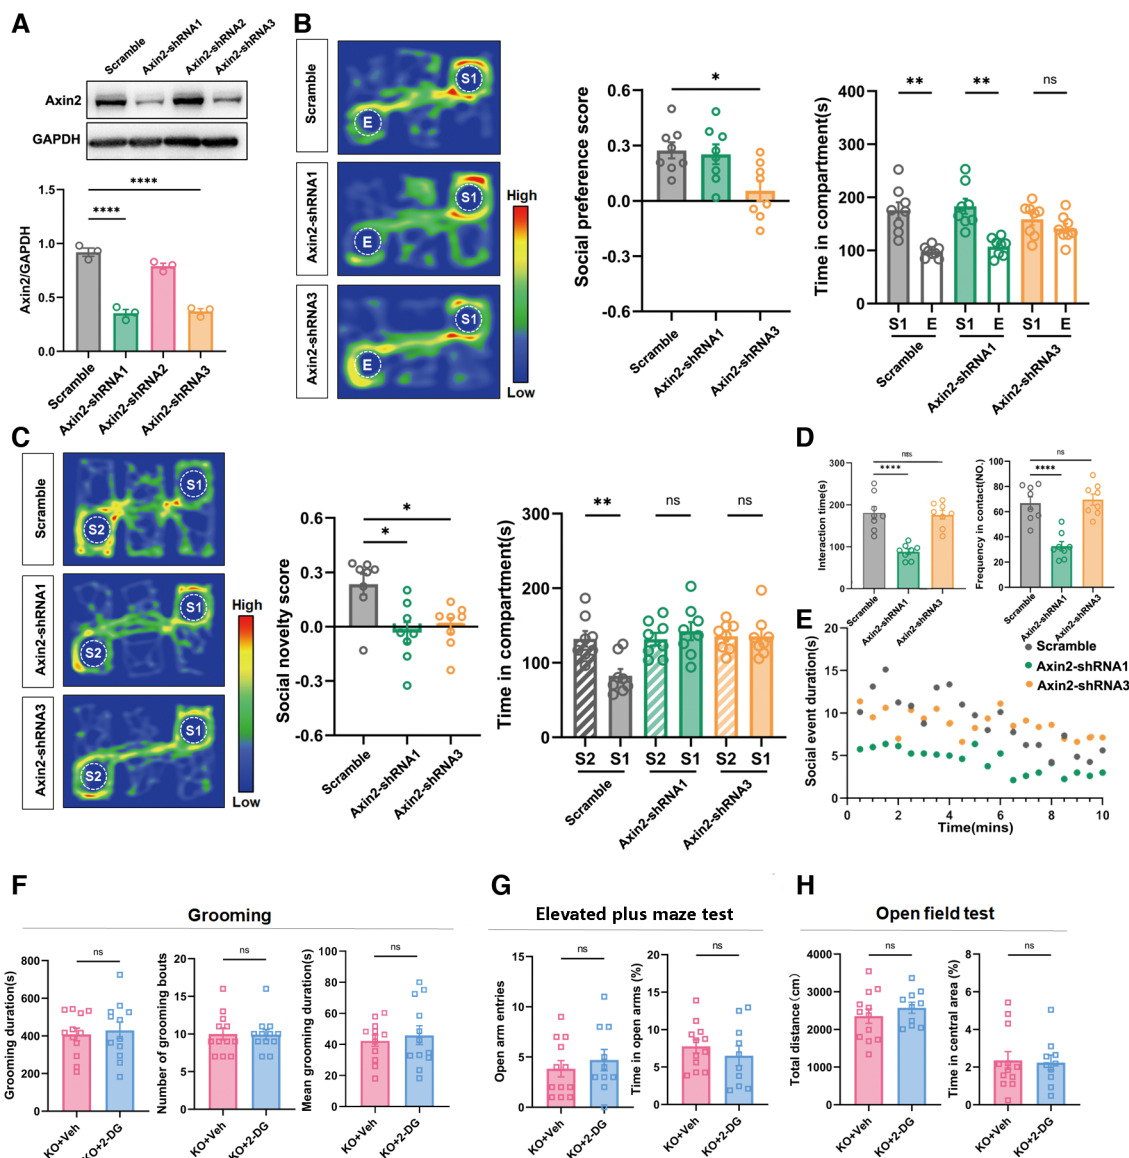

**Figure EV3. Effects of knocking down Axin2 in on the social behavior of WT mice and 2-DG treatment on repetitive/anxiety-like behaviors of *Shank3*<sup>-/-</sup> mice.**

A Western blotting verification of 3 Axin2-shRNA in ACC. Axin2-shRNA1 and Axin2-shRNA3 are efficient in knocking down Axin2.

B–E 3-chamber and resident-intruder assay of mice treated with scrambled RNA, Axin2-shRNA1 and Axin2-shRNA3. Notice the social impairment effects of Axin2-shRNA1 and Axin2-shRNA3.

F Grooming test of *Shank3*<sup>-/-</sup> mice treated with or without 2-DG.

G, H Elevated plus maze test and open-field test of *Shank3*<sup>-/-</sup> mice treated with or without 2-DG.

Data information:  $N = 3$  mice in (A), 8 mice (B–D) and 10–12 mice (E–G) mice per group. Mean ratio  $\pm$  SEM. One-way ANOVA with Tukey's multiple comparison test (A, D, social preference score in (B)). Kruskal–Wallis  $H$  test with Dunn's multiple comparison test (social novelty score in (C)). Paired  $t$ -test (time in compartment in Axin2-shRNA3 treated mice in (B), time in compartment in (C)). Wilcoxon signed-rank test (time in compartment of scrambled RNA and Axin2-shRNA3 treated mice in (B)). Two-tailed unpaired  $t$ -test and Mann–Whitney  $U$  test (F–H). \* $P < 0.05$ . \*\* $P < 0.01$ , \*\*\*\* $P < 0.0001$ .

Source data are available online for this figure.

**Figure EV4. Effects of XAV939 on the glycolysis/oxidative phosphorylation, social behavior, repetitive and anxiety-like behavior of ASD mice.**

- A ECAR assay of VPA-neurons treated with or without XAV939. Notice the decrease of glycolysis in XAV939-treated cells.
- B OCR assay of VPA-neurons treated with or without XAV939. Notice the increase of oxidative phosphorylation in XAV939-treated cells.
- C–E 3-chamber assay of *Shank3*<sup>-/-</sup> mice at 1 week following the last administration of XAV939. Notice the social improvement in XAV939-treated cells.
- F–H Grooming test, elevated plus maze test and open-field test of *Shank3*<sup>-/-</sup> mice treated with or without XAV939.
- I–K Grooming test, elevated plus maze test and open-field test of VPA-ASD mice treated with or without XAV939.

Data information:  $N = 4$ – $5$  batches of cells per group (A, B), 8 mice (D, E) and 7–8 mice (F–K) per group. Mean ratio  $\pm$  SEM. Two-tailed unpaired  $t$ -test (max ECAR in B). Mann–Whitney  $U$  test (ECAR in (B), Open arm entries in (J) and (A)). \* $P < 0.05$ . \*\* $P < 0.01$ . Two-tailed unpaired  $t$ -test (social novelty score in E, F–K). Paired  $t$ -test (time in compartment in D and E). Wilcoxon signed-rank test (social preference scores in (E)). \* $P < 0.05$ , \*\* $P < 0.01$ . Source data are available online for this figure.

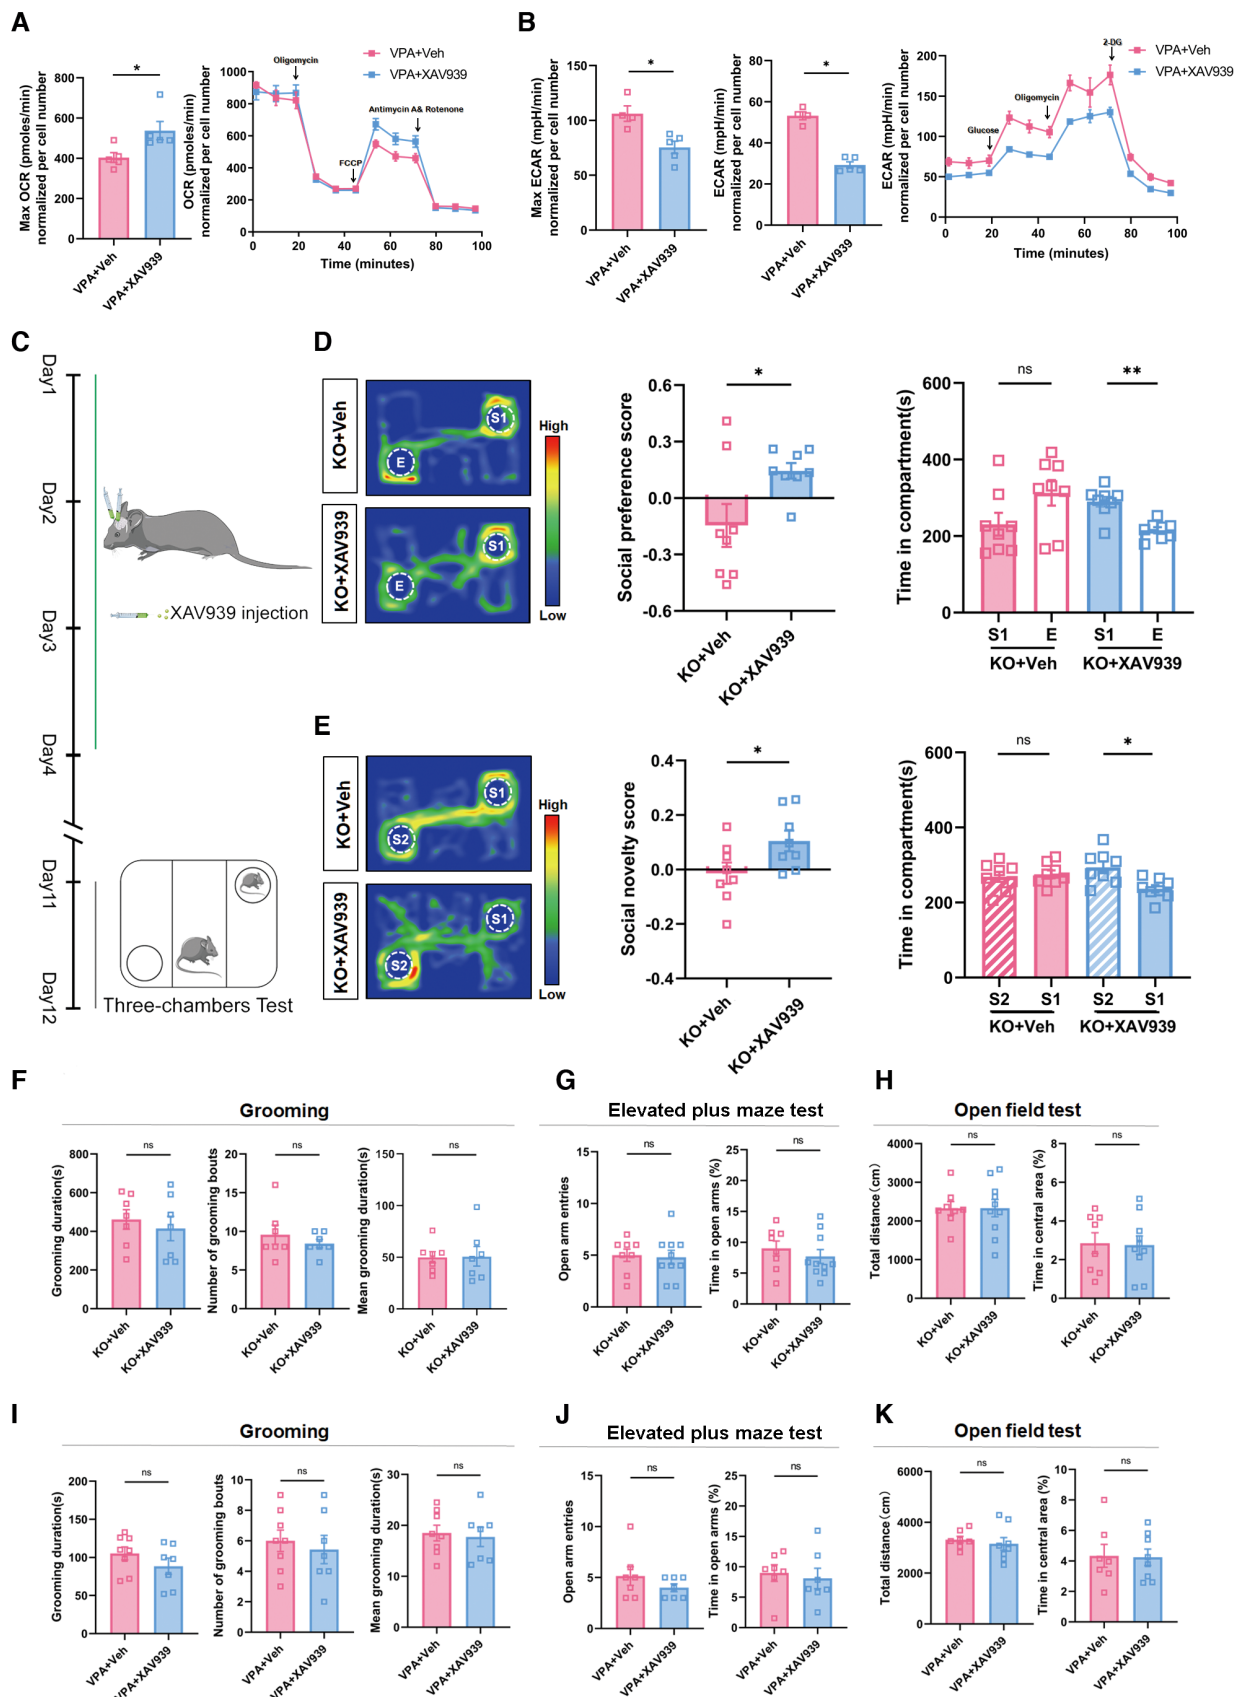

Figure EV4.

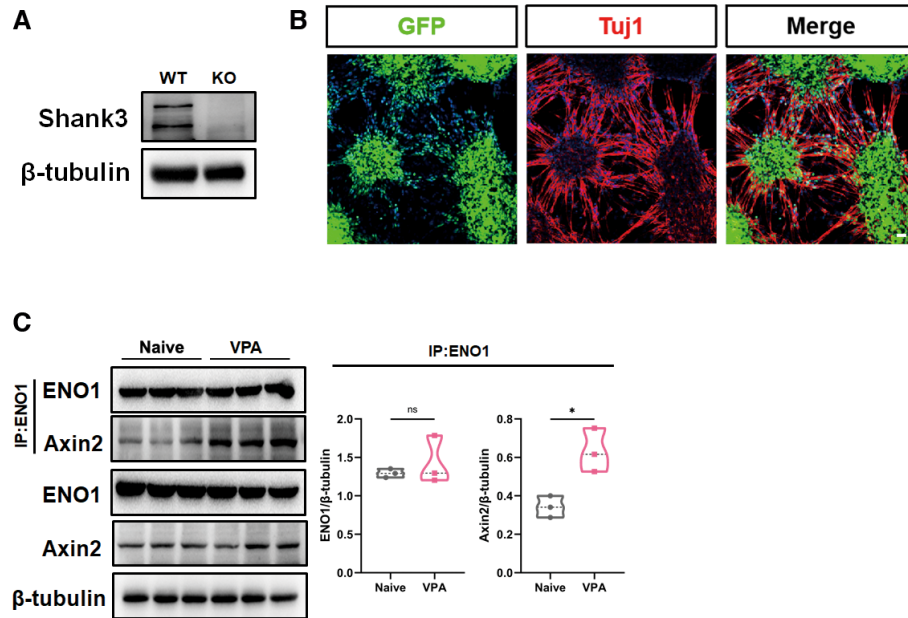

**Figure EV5. Shank3 mutation and neural induction in human ESCs and interaction of Axin2/ENO1 in naive and VPA-pretreated ESCs.**

A Western blotting of Shank3 in WT and *Shank3* mutant human neurons.

B Immunocytochemistry of Tuj-1 in human ESCs after neural induction. At this stage, human neurons were used for experiments. Bar = 5 μm.

C Protein CO-IP of Axin2/ENO1 in naive and VPA-treated human neurons.

Data information:  $N = 3$  batches of cells. Two-tailed unpaired  $t$ -test. \* $P < 0.05$ .

Source data are available online for this figure.
